1 **Optimal number and placement of EEG electrodes for**  
2 **measurement of neural tracking of speech**

3 **Jair Montoya-Martínez**

4 KU Leuven, Department of Neurosciences, Research Group Experimental  
5 Oto-Rhino-Laryngology

6 E-mail: [jair.montoya@kuleuven.be](mailto:jair.montoya@kuleuven.be)

7 **Alexander Bertrand**

8 KU Leuven, Department of Electrical Engineering (ESAT), Stadius Center for  
9 Dynamical Systems, Signal Processing and Data Analytics

10 E-mail: [alexander.bertrand@esat.kuleuven.be](mailto:alexander.bertrand@esat.kuleuven.be)

11 **Tom Francart**

12 KU Leuven, Department of Neurosciences, Research Group Experimental  
13 Oto-Rhino-Laryngology

14 E-mail: [tom.francart@med.kuleuven.be](mailto:tom.francart@med.kuleuven.be)

## *Optimal number and placement of EEG electrodes for measurement of neural tracking of speech 2*

**Abstract.** Measurement of neural tracking of natural running speech from the electroencephalogram (EEG) is an increasingly popular method in auditory neuroscience and has applications in audiology. The method involves decoding the envelope of the speech signal from the EEG signal, and calculating the correlation with the envelope that was presented to the subject. Typically EEG systems with 64 or more electrodes are used. However, in practical applications, set-ups with fewer electrodes are required. Here, we determine the optimal number of electrodes, and the best position to place a limited number of electrodes on the scalp. We propose a channel selection strategy, aiming to induce the selection of symmetric EEG channel groups in order to avoid hemispheric bias. The proposed method is based on a utility metric, which allows a quick quantitative assessment of the influence of each group of EEG channels on the reconstruction error. We consider two use cases: a subject-specific case, where the optimal number and positions of the electrodes is determined for each subject individually, and a subject-independent case, where the electrodes are placed at the same positions (in the 10-20 system) for all the subjects. We evaluated our approach using 64-channel EEG data from 90 subjects. Surprisingly, in the subject-specific case we found that the correlation between actual and reconstructed envelope first increased with decreasing number of electrodes, with an optimum at around 20 electrodes, yielding 38% higher correlations using the optimal number of electrodes. In the subject-independent case, we obtained a stable decoding performance when decreasing from 64 to 32 channels. When the number of channels was further decreased, the correlation decreased. For a maximal decrease in correlation of 10%, 32 well-placed electrodes were sufficient in 87% of the subjects. Practical electrode placement recommendations are given for 8, 16, 24 and 32 electrode systems.

## 1. Introduction

To understand how the human brain processes an auditory stimulus, it is essential to use ecologically valid stimuli. An increasingly popular method is to measure neural tracking of natural running speech from the electroencephalogram (EEG). This method also has applications in domains such as audiology, as part of an objective measure of speech intelligibility (Vanthornhout et al., 2018; Lesenfants et al., 2019), and coma science (Braithwaite et al., 2018).

The relationship between the stimulus and the brain response can be studied using two different models (e.g., Crosse et al., 2016; Lalor and Foxe, 2010; Ding and Simon, 2012; Verschueren et al., 2019; Vanthornhout et al., 2018): in the forward model (also known as encoding model), we determine a linear mapping from the stimulus to the brain response. On the other hand, in the backward model (also known as stimulus reconstruction), we determine the linear mapping from the brain response to the stimulus. Backward models are referred to as decoding models, because they attempt to reverse the data generation process. Both the forward and backward models involve the solution of a linear least squares (LS) regression problem. The quality of the reconstruction is usually quantified in terms of correlation between the true signal and the reconstructed one. The benefit of the forward model is that the obtained models (also called temporal response functions) can be easily interpreted, and topographical information can be easily

### *Optimal number and placement of EEG electrodes for measurement of neural tracking of speech 3*

58 obtained. The benefit of the backward model is that through combination of information  
59 across EEG channels, better performance (higher correlations) can be obtained, but the  
60 model coefficients can not be easily interpreted. In this experimental paradigm, the  
61 most used stimulus representation is its slowly varying temporal envelope (e.g., Ding and  
62 Simon, 2011; Aiken and Picton, 2008), which is known to be one of the most important  
63 cues for speech recognition (Shannon et al., 1995).

64 While in research one can easily use EEG systems with 64 electrodes or more, for  
65 practical applications, such as objective measurement of speech intelligibility in the clinic,  
66 there are stronger constraints due to the cost of systems with a large number of channels  
67 and the time required to place the electrodes on the scalp. We therefore considered  
68 the following questions: for a smaller number of electrodes, (1) what is the optimal  
69 location of electrodes on the scalp and (2) what is the impact on decoding accuracy when  
70 we decrease the number of channels. We can consider two use cases: in one case the  
71 optimal number and position of electrodes is determined for each subject individually.  
72 This is probably mostly applicable in research or very specialised applications. Another,  
73 more practical use case is where the electrodes are placed at the same positions (in the  
74 10-20 system) for all subjects, which would for instance be relevant in the design of an  
75 application-specific headset or electrode cap. Given its advantages in decoding accuracy  
76 over the forward model, we focused on the backward model.

77 We started from 64-channel recordings, and considered the question which subset  
78 of  $K$  channels allow to get the best decoding performance. This is a combinatorial  
79 problem, closely related to the column subset selection problem (Boutsidis et al., 2009),  
80 whose NP-hardness is an interesting open problem. In order to overcome this challenge,  
81 (Mirkovic et al., 2015; Fuglsang et al., 2017) used a channel selection strategy based on  
82 an iterative backward elimination approach, where at each iteration, the electrode with  
83 the lowest corresponding coefficient magnitudes in the decoder is removed from the next  
84 iteration (we will refer to this channel selection method as the decoder magnitude-based  
85 (DMB) method). This strategy assumes that important channels will have a large  
86 coefficient in the least squares solution. However, as pointed out by (Bertrand, 2018),  
87 this is an unsuitable assumption: for example, if the coefficients of one of the channels  
88 would all be scaled with a factor  $\alpha$ , then the corresponding decoder coefficient in the  
89 LS solution would be scaled with  $\alpha^{-1}$ , whereas the information content of that channel  
90 obviously remains unchanged.

91 In this work, we propose a channel selection strategy, aiming to induce the selection  
92 of *symmetric* EEG channel groups (see Figure 1), where, for channels located off the  
93 midline each group is composed of one channel located over the left hemisphere and its  
94 closest symmetric counterpart located over the right hemisphere. For channels located  
95 over the central line dividing both hemispheres, each group is composed of one channel  
96 located over the frontal lobe and its closest symmetric counterpart located either over  
97 the parietal or the occipital lobe. The rationale behind this channel selection strategy is  
98 to maintain symmetry. The symmetry criterion avoids bias to one hemisphere, which  
99 could be problematic as hemispheric differences are often found between subjects (e.g.,

## *Optimal number and placement of EEG electrodes for measurement of neural tracking of speech* 4

100 Goossens et al., 2019; Van Eeckhoutte et al., 2018; Poelmans et al., 2012; Vanvooren  
101 et al., 2015). The proposed method is based on the utility metric (Bertrand, 2018),  
102 which allows a quick quantitative assessment of the influence of each group of channels  
103 on the reconstruction error. A similar channel selection strategy, also based on the  
104 utility metric, was proposed by (Narayanan and Bertrand, 2019) on an auditory attention  
105 decoding task, where the main goal was to optimize the topology of a wireless EEG sensor  
106 network (WESN), without imposing a symmetry constraint on the selected channels.  
107 We evaluated our approach using EEG data from 90 subjects. We aimed to minimize  
108 reconstruction error, and to minimize the intra-subject variability in reconstruction error.

## 109 **2. Methods**

### 110 *2.1. Data collection*

111 *2.1.1. Participants* Ninety Flemish-speaking volunteers participated in this study.  
112 They were recruited from our university student population to ensure normal language  
113 processing and cognitive function. Each participant reported normal hearing, which was  
114 verified by pure tone audiometry (thresholds lower than 25 dB HL for 125 Hz until 8000  
115 Hz using MADSEN Orbiter 922–2 audiometer). Before each experiment, the participants  
116 signed an informed consent form approved by the Medical Ethics Committee UZ KU  
117 Leuven/Research (KU Leuven).

118 *2.1.2. Experiment* Each participant listened attentively to the children’s story “Milan”,  
119 written and narrated in Flemish by Stijn Vranken. The stimulus was 15 minutes long and  
120 was presented binaurally at 60 dBA without any noise. It was presented through Etymotic  
121 ER-3A insert phones (Etymotic Research, Inc., IL, USA) which were electromagnetically  
122 shielded using CFL2 boxes from Perancea Ltd. (London, UK). The acoustic system was  
123 calibrated using a 2-cm<sup>3</sup> coupler of the artificial ear (Brüel & Kjær, type 4192). The  
124 experimenter sat outside the room and presented the stimulus using the APEX 3 (version  
125 3.1) software platform developed at ExpORL (Dept. Neurosciences, KU Leuven, Belgium)  
126 (Francart et al., 2008) and a RME Multiface II sound card (RME, Haimhausen, Germany)  
127 connected to a laptop. The experiments took place in a soundproof, electromagnetically  
128 shielded room.

129 *2.1.3. EEG acquisition* In order to measure the EEG responses, we used a BioSemi  
130 (Amsterdam, Netherlands) ActiveTwo EEG setup with 64 channels. The signals were  
131 recorded at a sampling rate of 8192 Hz, using the ActiView software provided by BioSemi.  
132 The electrodes were placed over the scalp according to the international 10-20 standard.

### 133 *2.2. Signal processing*

134 *2.2.1. EEG pre-processing* In order to decrease computation time, the EEG data was  
135 downsampled from 8192 Hz to 1024 Hz. Then, the EEG artifacts were removed by

## *Optimal number and placement of EEG electrodes for measurement of neural tracking of speech* 5

136 using the Sparse Time Artifact Removal method (STAR) (de Cheveigné, 2016), as well  
137 as a multi-channel Wiener filter algorithm (Somers et al., 2018). Next, the data was  
138 bandpass filtered between 0.5-4 Hz (delta band), using a Chebyshev filter with 80 dB  
139 attenuation at 10 % outside the passband. Finally, the data was downsampled to 64 Hz  
140 and re-referenced to Cz in the channel subset selection stage, and to a common-average  
141 reference (across the selected channels) in the decoding performance evaluation stage.  
142 The delta band was chosen because it yields the highest correlations and most information  
143 in the stimulus envelope is in this frequency band (Vanthornhout et al., 2018; Ding and  
144 Simon, 2014). However, this choice is application-dependent and it is straightforward to  
145 repeat our analysis with different filter settings.

146 *2.2.2. Speech envelope* The speech envelope was computed according to (Biesmans et al.,  
147 2017), who showed that good reconstruction accuracy can be achieved with a gammatone  
148 filterbank followed by a power law. We used a gammatone filterbank (Søndergaard  
149 et al., 2012; Søndergaard and Majdak, 2013), with 28 channels spaced by 1 equivalent  
150 rectangular bandwidth, with centre frequencies from 50 Hz to 5000 Hz. From each  
151 subband, we take the absolute value of each sample and raise it to the power of 0.6.  
152 The resulting 28 signals were then downsampled to 1024 Hz, averaged, bandpass filtered  
153 with a (0.5-4 Hz) Chebyshev filter to obtain the final envelope, and finally downsampled  
154 again to 64Hz. The power law was chosen as the human auditory system is not a linear  
155 system and compression is present in the system. The gammatone filterbank was chosen  
156 as it mimics the auditory filters present in the basilar membrane in the cochlea.

157 *2.2.3. Backward model* The backward model to decode a speech envelope from the  
158 EEG can be stated as a regularized linear least squares (LS) problem (O’sullivan et al.,  
159 2014):

$$J(\mathbf{X}) \triangleq \underset{\mathbf{w}}{\text{minimize}} \|\mathbf{X}\mathbf{w} - \mathbf{y}\|_2^2 + \lambda\|\mathbf{w}\|_2^2 \quad (1)$$

160 where  $\mathbf{X} \in \mathbb{R}^{T \times (N \times \tau)}$  is the EEG data matrix concatenated with  $\tau$  time-shifted (zero-  
161 padded) version of itself,  $\mathbf{y} \in \mathbb{R}^{T \times 1}$  is the speech envelope,  $\mathbf{w} \in \mathbb{R}^{(N \times \tau) \times 1}$  is the decoder,  
162  $T$  is the total number of time samples,  $N$  is the number of channels,  $\tau$  is the number of  
163 time samples covering the time integration window of interest, and  $\lambda$  is a regularization  
164 parameter. The solution to the backward problem ( $\hat{\mathbf{w}}$ ) is usually referred to as a decoder.  
165 In order to choose the regularization parameter  $\lambda$ , we compute and sort the eigenvalues  
166 of the covariance matrix associated to  $\mathbf{X}$ . Then, we pick as  $\lambda$  the eigenvalue where the  
167 accumulated percentage of explained variance is greater than 99%.

*2.2.4. Channel selection* To select channels we used the utility metric (Bertrand, 2018),  
which quantifies the effective loss, i.e., the increase in the LS cost, if a group of columns  
(corresponding to one channel or a set of channels and all their  $\tau - 1$  corresponding  
time-shifted version) would be removed and if the model (1) would be reoptimized

## Optimal number and placement of EEG electrodes for measurement of neural tracking of speech 6

afterwards:

$$U_g \triangleq J(\mathbf{X}_{-g}) - J(\mathbf{X}) \quad (2)$$

168 where  $\mathbf{X}_{-g}$  denotes the EEG data matrix  $\mathbf{X}$  after removing the columns associated with  
169 the  $g$ -th group of channels and their corresponding time-shifted versions. We will later  
170 on define how channels are grouped in our experiments (see Subsection 2.2.5).

171 Note that a naive implementation of computing  $U_g$  would require solving one LS  
172 squares problem like (1), for each possible removal of a candidate group, which could  
173 potentially lead to a large computational cost for problems with large dimensions and/or  
174 involving a large number of groups. Fortunately, this can be circumvented, as shown  
175 by (Bertrand, 2018), with a final computational complexity that scales linearly in the  
176 number of groups, given the solution of (1) when none of the channels are removed. The  
177 basic workflow for finding the best  $k$  groups of EEG channels can be summarized as  
178 follows (Narayanan and Bertrand, 2019): we compute the utility metric for each of the  
179 groups and remove the group with the lowest utility. Next, we recalculate the new values  
180 of the utility metric taking only into account the remaining groups, and once again we  
181 remove the one with the lowest value of utility. We continue iterating following these  
182 steps until we arrive to  $k$  groups.

183 We used the utility metric in two conditions: (1) in the subject-specific case where  
184 optimal electrodes are selected for each subject, and (2) in the generic case where the  
185 same set of electrodes is used for all subjects.

186 In the subject-specific case, we computed (for each subject  $i$ ) the regularized  
187 covariance matrix  $C^{(i)} = \frac{\mathbf{x}^{(i)\top} \mathbf{x}^{(i)}}{T} + \lambda \mathbf{I}$  ( $\mathbf{I}$  denotes the identity matrix) and the cross-  
188 correlation vector  $\mathbf{r}^{(i)} = \frac{\mathbf{x}^{(i)\top} \mathbf{y}}{T}$  in order to compute the optimal all-channel decoder  
189  $\hat{\mathbf{w}}^{(i)} = (C^{(i)})^{-1} \mathbf{r}^{(i)}$ . The utility metric for each (group of) channel(s) can be directly  
190 computed<sup>‡</sup> from  $\hat{\mathbf{w}}^{(i)}$  and  $C^{(i)}$  (we refer to (Bertrand (2018)) and (Narayanan and  
191 Bertrand (2019)) for more details). We then ranked the groups according to their  
192 corresponding utilities, and removed the channel(s) corresponding to the group  $g$  with  
193 the lowest utility. We then repeated the same process with the matrix  $X_{-g}^{(i)}$  in which the  
194 columns corresponding to the channels in group  $g$  were removed. We kept repeating this  
195 process until only  $k$  groups remained.

196 Next, during the decoding evaluation stage, we computed a decoder by solving the  
197 backward problem using the best  $k$  selected groups of channels for each subject. In this  
198 stage, we re-referenced the channels with respect to the common average across the  
199 selected channels and discarded the reference electrode Cz. We solved each backward  
200 problem using a 7-fold cross-validation approach, where 6 folds were used for training and  
201 1 for testing. This corresponds to approximately 12 and 2 minutes of data, respectively.  
202 Using the decoder  $\hat{\mathbf{w}}$ , we computed the reconstructed envelope as  $\hat{\mathbf{y}} = \mathbf{X} \hat{\mathbf{w}}$  after which  
203 we computed the Spearman correlation between the reconstructed speech envelope ( $\hat{\mathbf{y}}$ )  
204 and the true one ( $\mathbf{y}$ ). By following this procedure, for each subject, we ended up with 7

<sup>‡</sup> We used the utility metric toolbox from (Narayanan and Bertrand (2019)) available at <https://github.com/mabhijithn/channelselect>



## *Optimal number and placement of EEG electrodes for measurement of neural tracking of speech* 7

205 values of correlation (corresponding to the evaluation of the correlation using each one  
206 of the test folds), which can be arranged as an array  $\mathbf{S} \in \mathbb{R}^{90 \times k \times 7}$  (number of subjects  $\times$   
207 number of groups  $\times$  number of test folds).

208 To compare with the literature, we also implemented the DMB approach, wherein  
209 we iteratively solved a backward problem for each subject, and at each iteration, the  
210 group of electrodes with the lowest corresponding coefficient magnitudes in the decoder  
211 was removed from the next iteration.

212 In the generic case, where the same set of electrodes is used for all subjects, we  
213 only used the utility metric. The evaluation consisted of the same two stages described  
214 above. The only difference was that, during the channel selection stage, we computed a  
215 grand average model by averaging the covariance matrices of all the subjects, which is  
216 equivalent to concatenating all the data from all the subjects in the data matrix  $X$  in  
217 (1). Finally, the decoding evaluation stage followed exactly the same steps described for  
218 the subject-specific case above, i.e., using a subject-*specific* decoder (yet, computed over  
219 electrodes that were selected in a subject-*independent* fashion).

220 *2.2.5. Symmetric grouping of the EEG channels* In addition to selecting individual  
221 channels to remove (no grouping of channels), we also evaluated a strategy in which  
222 symmetric groups of channels were removed, to avoid hemisphere bias effects across  
223 subjects. Each group is composed of two EEG channels (see Figure 1). For channels  
224 located on either side of the midline (Figure 1, groups with labels from 1 to 27), each  
225 group is composed by one channel located over the left hemisphere and its closest  
226 symmetric counterpart located over the right hemisphere. For channels located over  
227 the midline dividing both hemispheres (Figure 1, groups with labels from 28 to 31),  
228 each group is composed by one channels located over the frontal lobe and its closest  
229 symmetric counterpart located either over the parietal or the occipital lobe. Channel Cz  
230 does not belong to any group because it was used as a reference (in the channel subset  
231 selection stage). Channel Iz was not considered in order to preserve the symmetry with  
232 respect to the number of electrodes.

## 233 **3. Results**

### 234 *3.1. Channel selection strategies: utility metric vs DMB*

235 We compared the performance of the utility metric and DMB in the the subject-specific  
236 case, where the optimal electrode locations were determined for each subject individually.  
237 We compared the median of the correlation between  $\mathbf{y}$  and  $\hat{\mathbf{y}}$  for each subject, as well as  
238 the number of channels required to obtain it (from now on referred to as the optimal  
239 number of channels). Surprisingly, for both methods we observe a large increase in  
240 correlation when we use a reduced number of channels, with the optimum of the median  
241 around 20 and 36 channels, for the utility metric and DMB, respectively (see Figure 2a).  
242 This means that the evaluated strategies of removing electrodes can be used to improve

## Optimal number and placement of EEG electrodes for measurement of neural tracking of speech 8

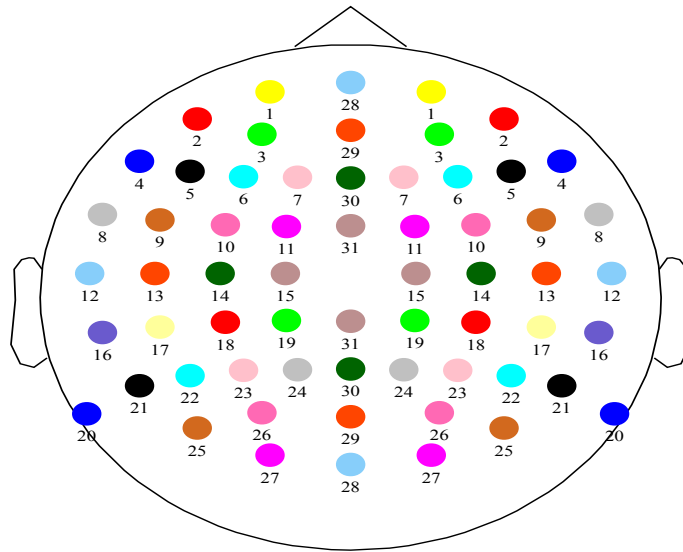

Figure 1: **Channel grouping strategy.** For channels located either over the left or right hemisphere (groups 1, 2, . . . , 27), each group is composed by one channel located over the left hemisphere and its closest symmetric counterpart located over the right hemisphere. For channels located over the central line dividing both hemispheres (groups 28, 29, 30, 31), each group is composed by one channels located over the frontal lobe and its closest symmetric counterpart located either over the parietal or the occipital lobe.

243 the correlation metric in high-density EEG recordings.

244 We can see in Figure 2a that the utility metric globally outperforms the DMB  
245 approach, obtaining consistently higher correlations (median) across subjects. In Figure  
246 2b, we can see that the utility metric also outperforms the DMB approach on an  
247 individual level, obtaining for every subject a higher value of maximal correlation, as well  
248 as requiring a smaller number of electrodes to obtain it. A Wilcoxon signed rank test  
249 showed that there was a significant difference ( $W=18$ ,  $p < 0.001$ ) between the correlation  
250 using the optimal number of channels according to the utility metric (median=0.22)  
251 compared to the one obtained using DMB (median=0.19). Another Wilcoxon signed rank  
252 test showed that there was also a significant difference ( $W=780.5$ ,  $p < 0.001$ ) between the  
253 optimal number of channels selected by the utility metric (median=10) compared to the  
254 optimal number selected by DMB (median=15). Because of the improved performance  
255 offered by the utility metric compared to DMB, we solely focus on the former in the  
256 remaining of the paper.

### 257 3.2. Channel selection based on the utility metric vs using all the channels

258 In this section, we compare the channel selection strategy based on the utility metric  
259 with the case where all the available channels are used. We compared both strategies in  
260 the subject-specific scenario, as well as the subject-independent (generic) one.



## *Optimal number and placement of EEG electrodes for measurement of neural tracking of speech* 9

261 *3.2.1. Subject-specific electrode locations* Figure 3a shows the median correlation,  
262 computed as the median across folds followed by the median across subjects. Blue  
263 dashed lines show the 25-th (lower) and 75-th (upper) percentile. In this figure, we can  
264 see that at least 50% (median) of the subjects exhibit a higher value of correlation for 6  
265 up to 64 channels.

266 Figure 3b shows the standard deviation of the correlation, as a measure for within-  
267 subject variability, computed as the standard deviation across folds followed by the  
268 median across subjects. Blue dashed lines show the 25-th (lower) and 75-th (upper)  
269 percentile. In this figure we can see a largely stable standard deviation of the correlation  
270 around the reference value (standard deviation of the correlation when using all the 64  
271 channels).

272 Figures 3a and 3b suggest that we could obtain a slightly higher correlation with  
273 a reduced number of channels. However, these are group results. Figure 3c shows,  
274 independently for each subject, the difference between the correlation when we use all  
275 the 64 channels and when we use a reduced number of channels. We can see that this  
276 effect is indeed consistently present for all subjects when we use a number of channels  
277 between 34 and 46. This behaviour can be seen more clearly in Figure 5a, where the  
278 percentage of subjects with a correlation greater or equal to 100%, 95% and 90% of the  
279 correlation obtained using all the channels (green, purple and cyan lines, respectively) is  
280 shown. Figure 5a clearly shows that for 98% of the subjects it is possible to reduce the  
281 number of channels to 32 and still be able to obtain a correlation higher than the one  
282 obtained using all the channels. Even if we go all the way down to 10 channels, we can  
283 see that 94%, 98% and 99% of the subjects is still able to get a correlation higher than  
284 100%, 95% and 90% of the correlation obtained using all channels, respectively.

285 Figure 3d shows a comparison of the correlation obtained using the optimal number  
286 of channels (obtained through the utility metric) versus the correlation obtained using all  
287 64 channels. In this figure we can see that for every subject the utility metric consistently  
288 yielded a higher value of correlation compared to using all the channels. A Wilcoxon  
289 signed rank test showed that there was a significant difference ( $W=0$ ,  $p < 0.001$ ) between  
290 the correlation using the optimal number of channels according to the utility metric  
291 (median=0.22) compared to the one obtained using all the channels (median=0.16),  
292 which is a 38% improvement.

293 So far we presented the results for the condition where we removed channels one by  
294 one. We also evaluated the symmetric grouping approach in the subject-specific case,  
295 but obtained worse results: median correlations with the optimal number of channels  
296 significantly decreased from 0.22 to 0.21 when moving from the channel-by-channel to  
297 the symmetric grouping strategy ( $W = 223$ ,  $p < 0.001$ ).

298 *3.2.2. Subject-independent electrode locations* We now consider the case where the same  
299 set of electrodes is used for all subjects. Figure 4a shows the correlation across subjects,  
300 computed as the median across folds followed by the median across subjects. In this  
301 figure, we can see that at least 50% (median) of the subjects exhibit a slightly higher

## Optimal number and placement of EEG electrodes for measurement of neural tracking of speech 10

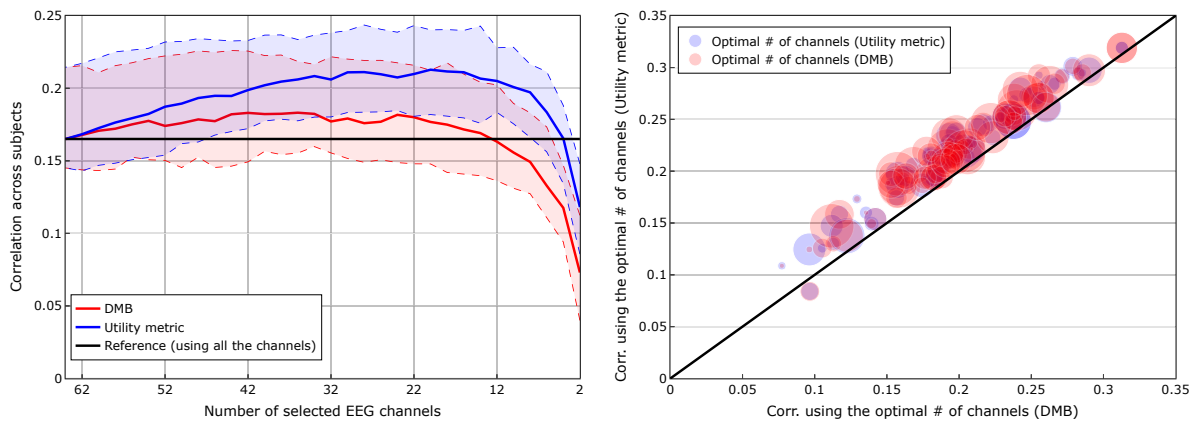

(a) Correlation across subjects, computed as the median across folds followed by the median across subjects. Dashed lines show the 25-th (lower) and 75-th (upper) percentile.

(b) Comparison of the correlation obtained using the optimal number of channels (number of channels where each subject obtained the highest correlation). Size of the markers is proportional to the optimal number of channels (one marker per subject).

**Figure 2: Comparison of channel selection strategies: utility metric vs DMB (*subject-specific scenario*).** A Wilcoxon signed rank test showed that there was a significant difference ( $W=18$ ,  $p < 0.001$ ) between the correlation obtained using the optimal number of channels according to the utility metric (median=0.22) compared to the one obtained using DMB (median=0.19). Another Wilcoxon signed rank test showed that there was also a significant difference ( $W=780.5$ ,  $p < 0.001$ ) between the optimal number of channels selected by the utility metric (median=10) compared to the one selected by DMB (median=15).

302 correlation for 20 up to 64 channels.

303 Contrary to the subject-specific electrode locations, we here found a benefit of  
304 using the symmetric channel grouping strategy: median correlations with the optimal  
305 number of channels significantly improved from 0.177 to 0.188 when moving from the  
306 channel-by-channel to symmetric grouping strategy ( $W = 1000$ ,  $p < 0.01$ ). In the figures  
307 and what follows, we only consider the results obtained with the symmetric grouping  
308 strategy.

309 Figure 4b shows the standard deviation of the correlation, as a measure of within-  
310 subject variability, computed as the standard deviation across folds followed by the  
311 median across subjects. In this figure we can see a largely stable standard deviation of  
312 the correlation around the reference value (standard deviation of the correlation when  
313 using all the 64 channels).

314 Figures 4a and 4b suggest that, similarly to the case with individual electrode  
315 locations, we could obtain a slightly higher value of correlation with a reduced number  
316 of channels. However, these are group results. Figure 4c shows, independently for  
317 each subject, the difference between the value of the correlation when we use all the 64

*Optimal number and placement of EEG electrodes for measurement of neural tracking of speech 11*

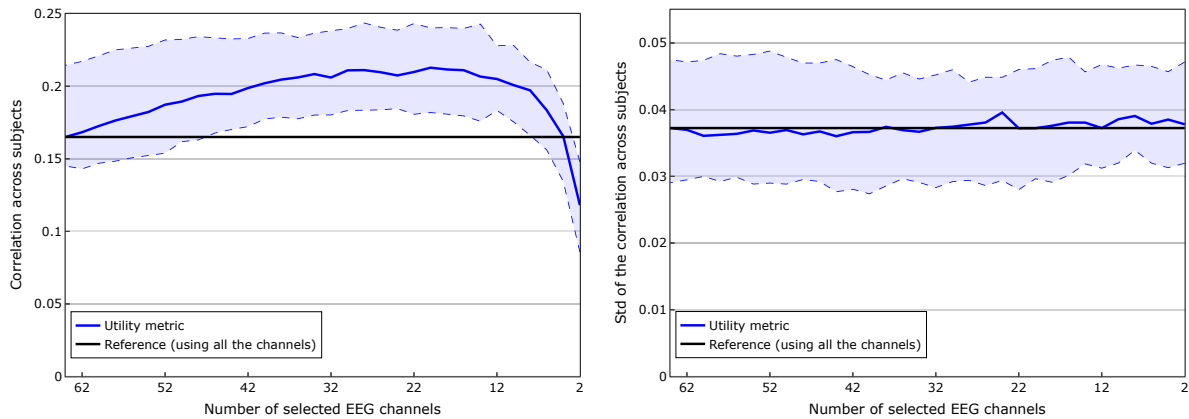

(a) Correlation computed as the median across folds followed by the median across subjects. Dashed lines show the 25-th (lower) and 75-th (upper) percentile.

(b) Standard deviation of the correlation coefficient, computed as the standard deviation across folds followed by the median across subjects. Dashed lines show the 25-th (lower) and 75-th (upper) percentile.

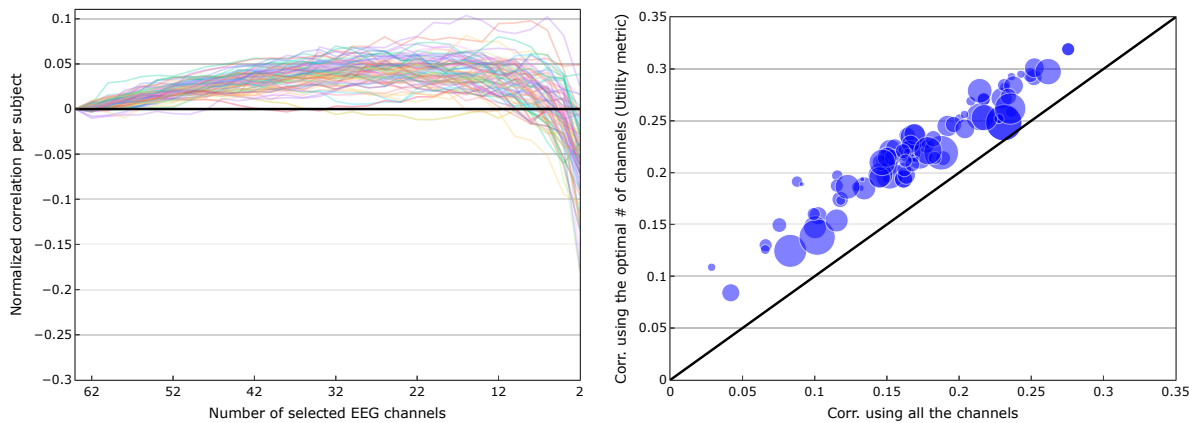

(c) Normalized correlation per subject (each line is a different subject), defined as the difference between the value of the correlation obtained when we use all the channels and the value of the correlation obtained when we use a reduced number of channels.

(d) Comparison of the correlation obtained using the optimal number of channels (number of channels where each subject obtained the highest correlation) vs the correlation obtained using all the channels. Size of the markers is proportional to the optimal number of channels (one marker per subject).

**Figure 3: Comparison of the channel selection based on the utility metric vs using all the channels (*subject-specific scenario*).** A Wilcoxon signed rank test showed that there was a significant difference ( $W=0$ ,  $p < 0.001$ ) between the correlation obtained using the optimal number of channels suggested by the utility metric (median=0.22) compared to the one obtained using all the channels (median=0.16). Only results for the individual (non-grouped) channel-by-channel selection strategy are shown as these provided the best results for the subject-specific scenario.

*Optimal number and placement of EEG electrodes for measurement of neural tracking of speech 12*

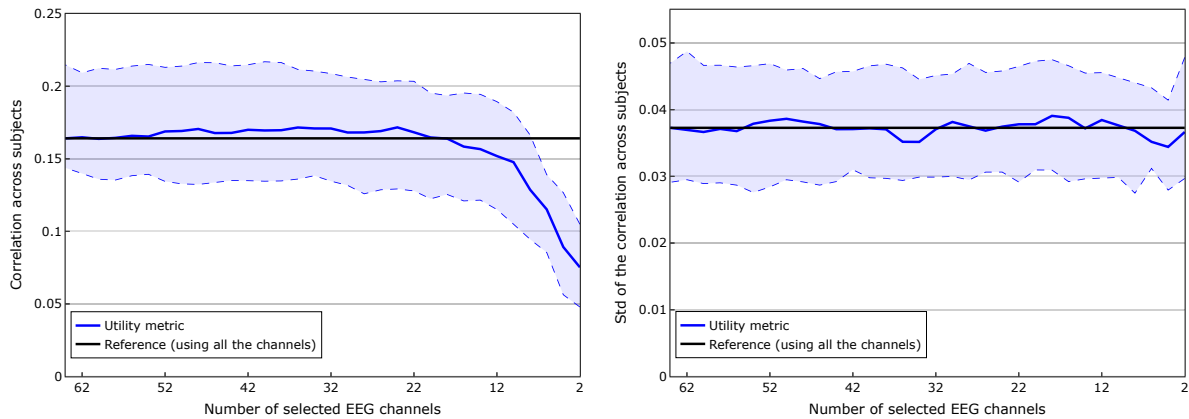

(a) Correlation across subjects, computed as the median across folds followed by the median across subjects. Dashed lines show the 25-th (lower) and 75-th (upper) percentile.

(b) Standard deviation of the correlation coefficient, computed as the standard deviation across folds followed by the median across subjects. Dashed lines show the 25-th (lower) and 75-th (upper) percentile.

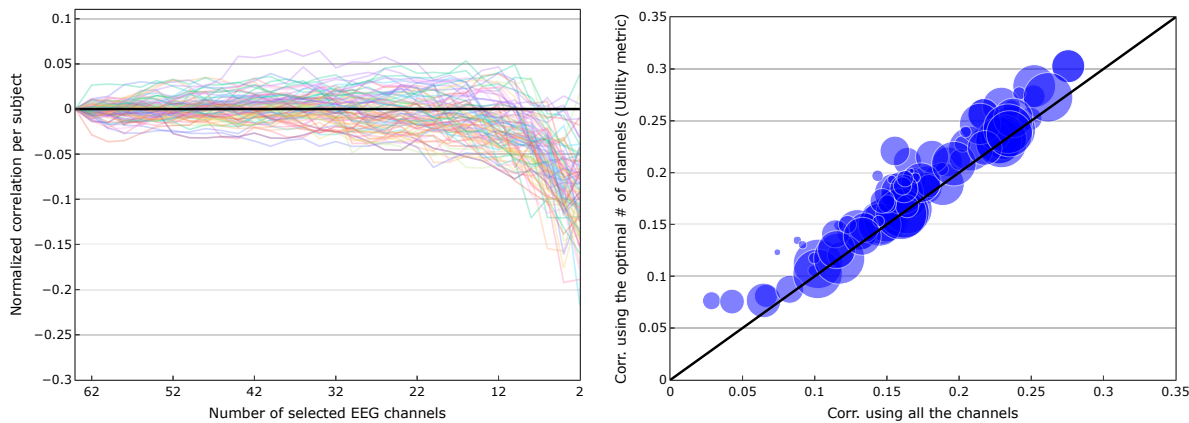

(c) Normalized correlation per subject (each line is a different subject), defined as the difference between the value of the correlation obtained when we use all the channels and the value of the correlation obtained when we use a reduced number of channels.

(d) Comparison of the correlation obtained using the optimal number of channels (number of channels where each subject obtained the highest correlation) vs the correlation obtained using all the channels. Size of the markers is proportional to the optimal number of channels (one marker per subject).

**Figure 4: Comparison of the channel selection based on the utility metric vs using all the channels (*subject-independent scenario*).** A Wilcoxon signed rank test showed that there was a significant difference ( $W=0$ ,  $p < 0.001$ ) between the correlation obtained using the optimal number of channels suggested by the utility metric (median=0.19) compared to the one obtained using all the channels (median=0.16). Only results for the symmetric channel grouping strategy are shown, as these provided the best results for the subject-independent scenario.

## *Optimal number and placement of EEG electrodes for measurement of neural tracking of speech* 13

318 channels and the value of the correlation when we use a reduced number of channels.  
319 We can see that this effect is not consistently present for all subjects (if that would  
320 have been the case, all the lines would have appeared above 0 when we use a reduced  
321 number of channels  $n_k$ ,  $20 \leq n_k < 64$ ). Nevertheless, a certain percentage of subjects  
322 do exhibit a higher value of the correlation when using a reduced number of channels.  
323 Figure 5b helps us to quantify this behaviour, by showing the percentage of subjects  
324 with a correlation greater or equal to 100%, 95% and 90% of the correlation obtained  
325 using all the channels (green, purple and cyan lines, respectively). In this figure we can  
326 see that for 52%, 70% and 87% of the subjects it is possible to reduce the number of  
327 channels to 32 and still be able to obtain a correlation higher than 100%, 95% and 90%  
328 of the correlation obtained using all channels, respectively. The percentage of subjects  
329 can increase to 56%, 78% and 91%, respectively, if we increase the number of channels  
330 from 32 to 36.

331 Figure 4d shows a comparison of the correlation obtained using the optimal number  
332 of channels suggested by the utility metric versus the correlation obtained using all 64  
333 channels. In this figure we can see that, similar to the subject-specific scenario, the utility  
334 metric consistently obtained, for every subject, a higher value of correlation compared to  
335 correlation obtained when using all the channels. A Wilcoxon signed rank test showed  
336 that there was a significant difference ( $W=0$ ,  $p < 0.001$ ) between the correlation obtained  
337 using the optimal number of channels suggested by the utility metric (median=0.19)  
338 compared to the one obtained using all the channels (median=0.16).

339 Figures 6a, 6b, 6c and 6d show the best 8, 16, 24 and 32 channels selected by the  
340 utility metric. Next to each group of channels (formed exactly by two electrodes, see  
341 Figure 1), a number is shown which is computed as  $N - p + 1$  where  $N$  is the total  
342 number of groups and  $p$  is the iteration at which the group was discarded in the greedy  
343 removal procedure. The lower this number, the more important the group, as it was  
344 retained for a longer number of iterations in the backwards greedy removal process due  
345 to its high influence in the LS cost (see Section 2.2.4). As we can see, the selected  
346 channels are mostly clustered over the left and right temporal lobes, which agrees with  
347 the empirical evidence which suggests that channels located close to auditory cortex  
348 are important for picking up electrical brain activity evoked as response to an auditory  
349 stimulus.

## 350 **4. Discussion**

351 Based on 64-channel EEG recordings, we determined the effect of reducing the number of  
352 available channels and the optimal electrode locations on the scalp for 4 frequently-used  
353 numbers of channels. This was based on a novel utility-based metric, by which we avoided  
354 the computationally intractable number of combinations that underlies the problem at  
355 hand.

356 (Mirkovic et al., 2015; Fuglsang et al., 2017) tackled the channels subset selection  
357 problem in the context auditory attention decoding (identify the attended speech stream

## Optimal number and placement of EEG electrodes for measurement of neural tracking of speech 14

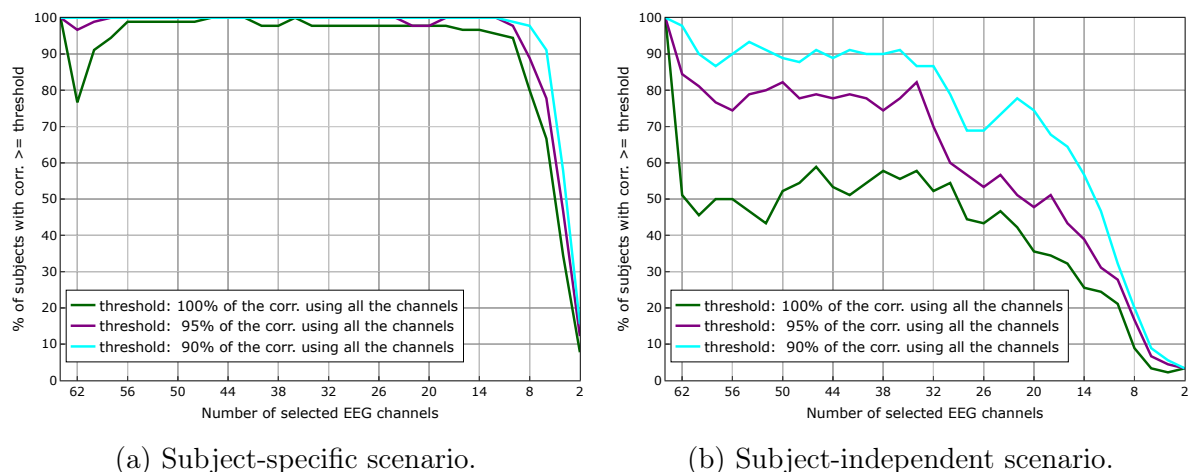

Figure 5: **Percentage of subjects with a correlation greater or equal to 100%, 95% and 90% of the correlation obtained using all the channels.** In the subject-specific scenario we can see that for 98% of the subjects is possible to reduce the number of channels to 32 and still be able to obtain a correlation higher than the one obtained using all the channels. In the subject-independent scenario we can see that for 52%, 70% and 87% of the subjects is possible to reduce the number of channels to 32 and still be able to obtain a correlation higher than 100%, 95% and 90% of the correlation obtained using all channels, respectively. The percentage of subjects can increase to 56%, 78% and 91%, respectively, if we increase the number of channels from 32 to 36.

358 in a multi-speaker scenario). (Mirkovic et al., 2015; Fuglsang et al., 2017) processed the  
359 EEG recordings from 12 and 29 subjects, acquired using an EEG system with 96 and  
360 64 channels, respectively. They found that, on average, the decoding accuracy dropped  
361 when using a number of channels less than 25. Both studies used the same channel  
362 selection strategy, which is based on an iterative backward elimination approach, where  
363 at each iteration, the channel with the lowest average decoder coefficient is removed  
364 from the next iteration. This strategy assumes that important channels will have a large  
365 coefficient in the LS solution. However, as explained in the introduction, this is not  
366 necessarily a suitable assumption. They did not report optimal electrode positions.

367 (Narayanan and Bertrand, 2019) also analyzed the channel subset selection problem  
368 in the context of auditory attention decoding, using a channel selection strategy based  
369 on the same utility metric discussed in the present study, but without imposing the  
370 symmetric grouping approach discussed in Section 2.2.5. They found that, on average,  
371 the decoding accuracy remained stable when using a number of channels greater or  
372 equal to 10. The (asymmetric) channels reported in their study correspond with the  
373 ones reported in this study in the sense that mostly channels around the left and right  
374 temporal lobes were selected.

375 Instead of attention decoding accuracy, we assessed the correlation between actual  
376 and reconstructed envelope (in a single-speaker scenario), which can be used as a metric  
377 for speech intelligibility (Vanthornhout et al., 2018; Lesenfants et al., 2019). For subject-



*Optimal number and placement of EEG electrodes for measurement of neural tracking of speech 15*

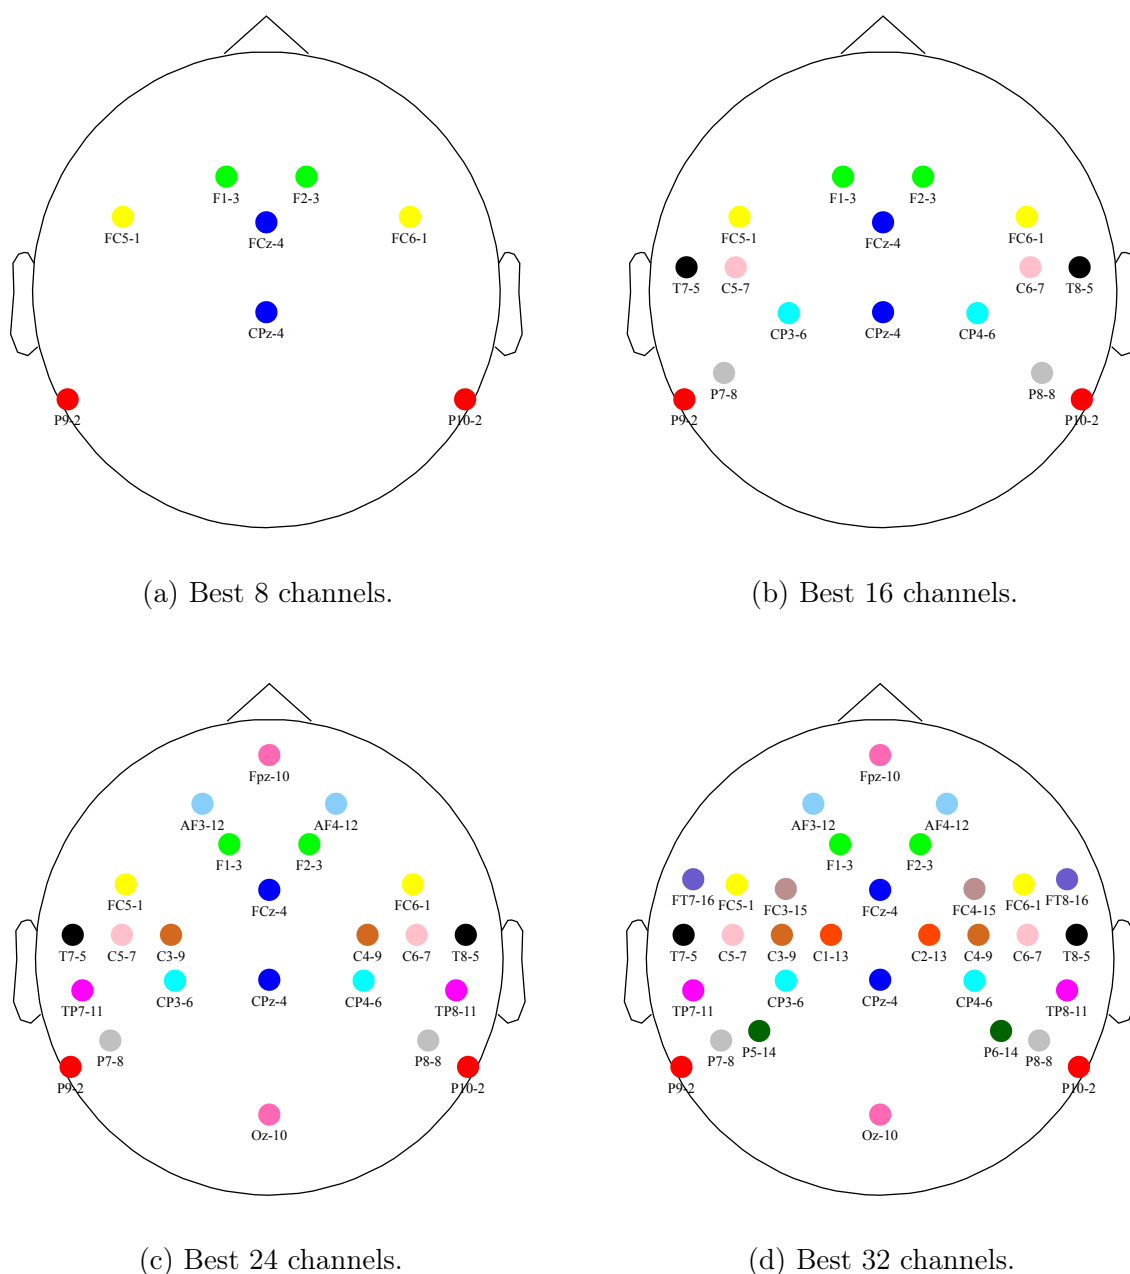

**Figure 6: Practical electrode placement recommendations.** The number next to each group of channels (formed by two electrodes, see Figure 1) indicates the ranking of the group with respect to its influence on the LS cost (see text). The lower this number, the more important the group.

378 specific electrode locations, we found similar differences between the DMB and utility  
 379 metric: using the DMB metric, on average 14 electrodes were required to avoid a drop in  
 380 correlation below the 64-channel case, and using the utility metric, only 6 electrodes were  
 381 required. On top of this, we found a substantial increase in correlation when reducing the  
 382 number of electrodes from 64 to 32-20. This indicates that application of the proposed

## *Optimal number and placement of EEG electrodes for measurement of neural tracking of speech* 16

383 channel selection approach may be practically useful.

384 The stable or sometimes even improved performance after reducing the number  
385 of channels could be attributed to the removal of noisy or irrelevant channels that do  
386 not contribute significantly to the reconstruction of the target speech envelope. As  
387 explained in Section 2.2.3, the backward problem is usually solved by using a regularized  
388 Ridge regression approach, which shrinks the magnitude of many decoder components  
389 to prevent overfitting (finding solutions that minimize the reconstruction error while  
390 satisfying, at the same time, the condition of having a small norm value). We recalculated  
391 the optimal regularization parameter for each number of channels. Reducing the number  
392 of channels has a similar regularization effect; it reduces the degrees of freedom by  
393 discarding irrelevant channels, making the model less prone to overfitting.

394 In the case where the same channels were selected for all subjects, the initial increase  
395 in correlation with decreasing number of channels was smaller and not present for all  
396 subjects. Therefore in this case our strategy is mainly useful to come up with a practical  
397 number and location of electrodes.

### 398 *4.1. Selected channels*

399 Based on the literature, we expect that most of the signals of interest originate from  
400 auditory cortex (e.g., Brodbeck et al., 2018; Pasley et al., 2012). We indeed see that  
401 channels that cover dipoles originating in this area are always selected with high priority.  
402 For higher numbers of channels, other areas are covered where auditory related responses  
403 have been shown to originate from, such as the inferior frontal cortex and the premotor  
404 cortex (Das et al., 2018; Lesenfants et al., 2019), and possibly channels that aid in the  
405 suppression of large irrelevant sources.

406 Note that channels that are typically prone to large artifacts, such as those close  
407 to the eyes (ocular artifacts) and in areas where the electrode-skin contact tends to be  
408 worse (lower portion of the occipital lobe) do not tend to be selected.

### 409 *4.2. Applications*

410 The backward model has been proposed in applications where an objective measure  
411 of speech intelligibility is needed. Our suggested electrode positions could be used to  
412 configure an electrode cap or headset for this specific application. We chose to run our  
413 calculations with the speech envelope as the stimulus feature and for the delta band  
414 (0.5-4Hz), as these parameters are most commonly used. Note that when deviating  
415 from these parameters, the selection should be re-run. In particular, when higher-order  
416 stimulus features are used, we expect significant changes in topography and therefore  
417 optimal electrode positions.

418 In cases where one has the opportunity to make an individual selection of electrode  
419 positions after the recording, our algorithm can be straightforwardly applied, and can  
420 lead to large increases in correlation.

421 **5. Conclusion**

422 In this work, the effect of selecting a reduced number of EEG channels was investigated  
423 within the context of the stimulus reconstruction task. We proposed a utility-based greedy  
424 channel selection strategy, aiming to induce the selection of symmetric EEG channel  
425 groups, while maximizing the covered area over the scalp. We evaluated our approach  
426 using 64-channel EEG data from 90 subjects. When using individual electrode selections  
427 for each subject, we found that the correlation between the actual and reconstructed  
428 envelope first increased with decreasing number of electrodes, with an optimum at  
429 around 20 electrodes. This means that the proposed method can be used in practice  
430 to obtain higher correlations. When using a generic electrode placement that is the  
431 same for all subjects, we obtained a stable decoding performance when using all 64  
432 channels down to 32, suggesting that it is possible to get an optimal reconstruction of the  
433 speech envelope from a reduced number of EEG channels. Practical electrode placement  
434 recommendations are given for 8, 16, 24 and 32 electrode systems.

435 **6. Acknowledgments**

436 The authors would like to thank to Abhijith Mundanad Narayanan for sharing his  
437 code to compute the utility metric, as well as for the insightful discussions about the  
438 mathematical properties of the utility metric. This project has received funding from the  
439 European Research Council (ERC) under the European Union’s Horizon 2020 research  
440 and innovation programme (grant agreement No 637424, ERC starting Grant to Tom  
441 Francart).

442 **References**

- 443 Aiken, S. J. and Picton, T. W. (2008). Human cortical responses to the speech envelope,  
444 *Ear and hearing* **29**(2): 139–157.
- 445 Bertrand, A. (2018). Utility Metrics for Assessment and Subset Selection of Input  
446 Variables for Linear Estimation [Tips & Tricks], *IEEE Signal Processing Magazine*  
447 **35**(6): 93–99.
- 448 Biesmans, W., Das, N., Francart, T. and Bertrand, A. (2017). Auditory-inspired speech  
449 envelope extraction methods for improved EEG-based auditory attention detection in  
450 a cocktail party scenario, *IEEE Transactions on Neural Systems and Rehabilitation*  
451 *Engineering* **25**(5): 402–412.
- 452 Boutsidis, C., Mahoney, M. W. and Drineas, P. (2009). An improved approximation  
453 algorithm for the column subset selection problem, *Proceedings of the Twentieth*  
454 *Annual ACM-SIAM Symposium on Discrete Algorithms*, SODA ’09, pp. 968–977.
- 455 Braiman, C., Fridman, E. A., Conte, M. M., Voss, H. U., Reichenbach, C. S., Reichenbach,  
456 T. and Schiff, N. D. (2018). Cortical response to the natural speech envelope correlates

## REFERENCES

18

- 457 with neuroimaging evidence of cognition in severe brain injury, *Current Biology*  
458 **28**(23): 3833–3839.
- 459 Brodbeck, C., Presacco, A. and Simon, J. Z. (2018). Neural source dynamics of brain  
460 responses to continuous stimuli: Speech processing from acoustics to comprehension,  
461 *NeuroImage* **172**: 162–174.
- 462 Crosse, M. J., Di Liberto, G. M., Bednar, A. and Lalor, E. C. (2016). The multivariate  
463 temporal response function (mTRF) toolbox: a MATLAB toolbox for relating neural  
464 signals to continuous stimuli, *Frontiers in human neuroscience* **10**: 604.
- 465 Das, P., Brodbeck, C., Simon, J. Z. and Babadi, B. (2018). Cortical localization of the  
466 auditory temporal response function from meg via non-convex optimization, *2018*  
467 *52nd Asilomar Conference on Signals, Systems, and Computers*, IEEE, pp. 373–378.
- 468 de Cheveigné, A. (2016). Sparse time artifact removal, *Journal of neuroscience methods*  
469 **262**: 14–20.
- 470 Ding, N. and Simon, J. Z. (2011). Neural coding of continuous speech in auditory cortex  
471 during monaural and dichotic listening, *Journal of neurophysiology* **107**(1): 78–89.
- 472 Ding, N. and Simon, J. Z. (2012). Emergence of neural encoding of auditory objects  
473 while listening to competing speakers, *Proceedings of the National Academy of Sciences*  
474 **109**(29): 11854–11859.
- 475 Ding, N. and Simon, J. Z. (2014). Cortical entrainment to continuous speech: functional  
476 roles and interpretations, *Frontiers in human neuroscience* **8**: 311.
- 477 Francart, T., Van Wieringen, A. and Wouters, J. (2008). APEX 3: a multi-purpose test  
478 platform for auditory psychophysical experiments, *Journal of neuroscience methods*  
479 **172**(2): 283–293.
- 480 Fuglsang, S. A., Dau, T. and Hjortkjær, J. (2017). Noise-robust cortical tracking of  
481 attended speech in real-world acoustic scenes, *Neuroimage* **156**: 435–444.
- 482 Goossens, T., Vercammen, C., Wouters, J. and van Wieringen, A. (2019). The  
483 association between hearing impairment and neural envelope encoding at different  
484 ages, *Neurobiology of Aging* **74**: 202–212.
- 485 Lalor, E. C. and Foxe, J. J. (2010). Neural responses to uninterrupted natural speech  
486 can be extracted with precise temporal resolution, *European journal of neuroscience*  
487 **31**(1): 189–193.
- 488 Lesenfants, D., Vanthornhout, J., Verschueren, E. and Francart, T. (2019). Data-  
489 driven spatial filtering for improved measurement of cortical tracking of multiple  
490 representations of speech, *Journal of Neural Engineering* .
- 491 Mirkovic, B., Debener, S., Jaeger, M. and De Vos, M. (2015). Decoding the attended  
492 speech stream with multi-channel EEG: implications for online, daily-life applications,  
493 *Journal of neural engineering* **12**(4): 046007.
- 494 Narayanan, A. M. and Bertrand, A. (2019). Analysis of miniaturization effects and  
495 channel selection strategies for EEG sensor networks with application to auditory  
496 attention detection, *IEEE Transactions on Biomedical Engineering* .

REFERENCES

19

- 497 O’sullivan, J. A., Power, A. J., Mesgarani, N., Rajaram, S., Foxe, J. J., Shinn-  
498 Cunningham, B. G., Slaney, M., Shamma, S. A. and Lalor, E. C. (2014). Attentional  
499 selection in a cocktail party environment can be decoded from single-trial EEG,  
500 *Cerebral Cortex* **25**(7): 1697–1706.
- 501 Pasley, B. N., David, S. V., Mesgarani, N., Flinker, A., Shamma, S. A., Crone, N. E.,  
502 Knight, R. T. and Chang, E. F. (2012). Reconstructing speech from human auditory  
503 cortex, *PLoS biology* **10**(1): 1–13.
- 504 Poelmans, H., Luts, H., Vandermosten, M., Ghesquière, P. and Wouters, J. (2012).  
505 Hemispheric asymmetry of auditory steady-state responses to monaural and diotic  
506 stimulation, *Journal of the Association for Research in Otolaryngology* **13**(6): 867–876.
- 507 Shannon, R. V., Zeng, F.-G., Kamath, V., Wygonski, J. and Ekelid, M. (1995). Speech  
508 recognition with primarily temporal cues, *Science* **270**(5234): 303–304.
- 509 Somers, B., Francart, T. and Bertrand, A. (2018). A generic EEG artifact removal  
510 algorithm based on the multi-channel Wiener filter, *Journal of neural engineering*  
511 **15**(3): 036007.
- 512 Søndergaard, P. L., Torrèsani, B. and Balazs, P. (2012). The linear time frequency  
513 analysis toolbox, *International Journal of Wavelets, Multiresolution and Information*  
514 *Processing* **10**(04): 1250032.
- 515 Søndergaard, P. and Majdak, P. (2013). The auditory modeling toolbox, *The technology*  
516 *of binaural listening*, Springer, pp. 33–56.
- 517 Van Eeckhoutte, M., Wouters, J. and Francart, T. (2018). Objective binaural loudness  
518 balancing based on 40-hz auditory steady-state responses. part i: Normal hearing,  
519 *Trends in Hearing* **22**.
- 520 Vanthornhout, J., Decruy, L., Wouters, J., Simon, J. Z. and Francart, T. (2018). Speech  
521 intelligibility predicted from neural entrainment of the speech envelope, *Journal of the*  
522 *Association for Research in Otolaryngology* pp. 1–11.
- 523 Vanvooren, S., Hofmann, M., Poelmans, H., Ghesquière, P. and Wouters, J. (2015).  
524 Theta, beta and gamma rate modulations in the developing auditory system, *Hearing*  
525 *research* **327**: 153–162.
- 526 Verschueren, E., Somers, B. and Francart, T. (2019). Neural envelope tracking as a  
527 measure of speech understanding in cochlear implant users, *Hearing research* **373**: 23–  
528 31.
